# Supplementary material for: Intervention effects on children’s movement behaviour accumulation as a result of the Transform-Us! school- and home-based cluster randomised controlled trial
Source: PubMed Central journal article supplement (PMC9261108; doi:10.1186/s12966-022-01314-z), 2022-07-07

#### **ADDITIONAL FILE 4**

Figure S2. Baseline movement behaviour accumulation compositions per intervention group

Figure S3. Post-intervention (18 months) movement behaviour accumulation compositions per intervention group

Figure S4. Baseline total volume compositions per intervention group

Figure S5. Post-intervention (18 months) total volume compositions per intervention group

Figure S6. Change between baseline and post-intervention (18 months) in total volume compositions per intervention group

Figure S2. Baseline movement behaviour accumulation compositions per intervention group

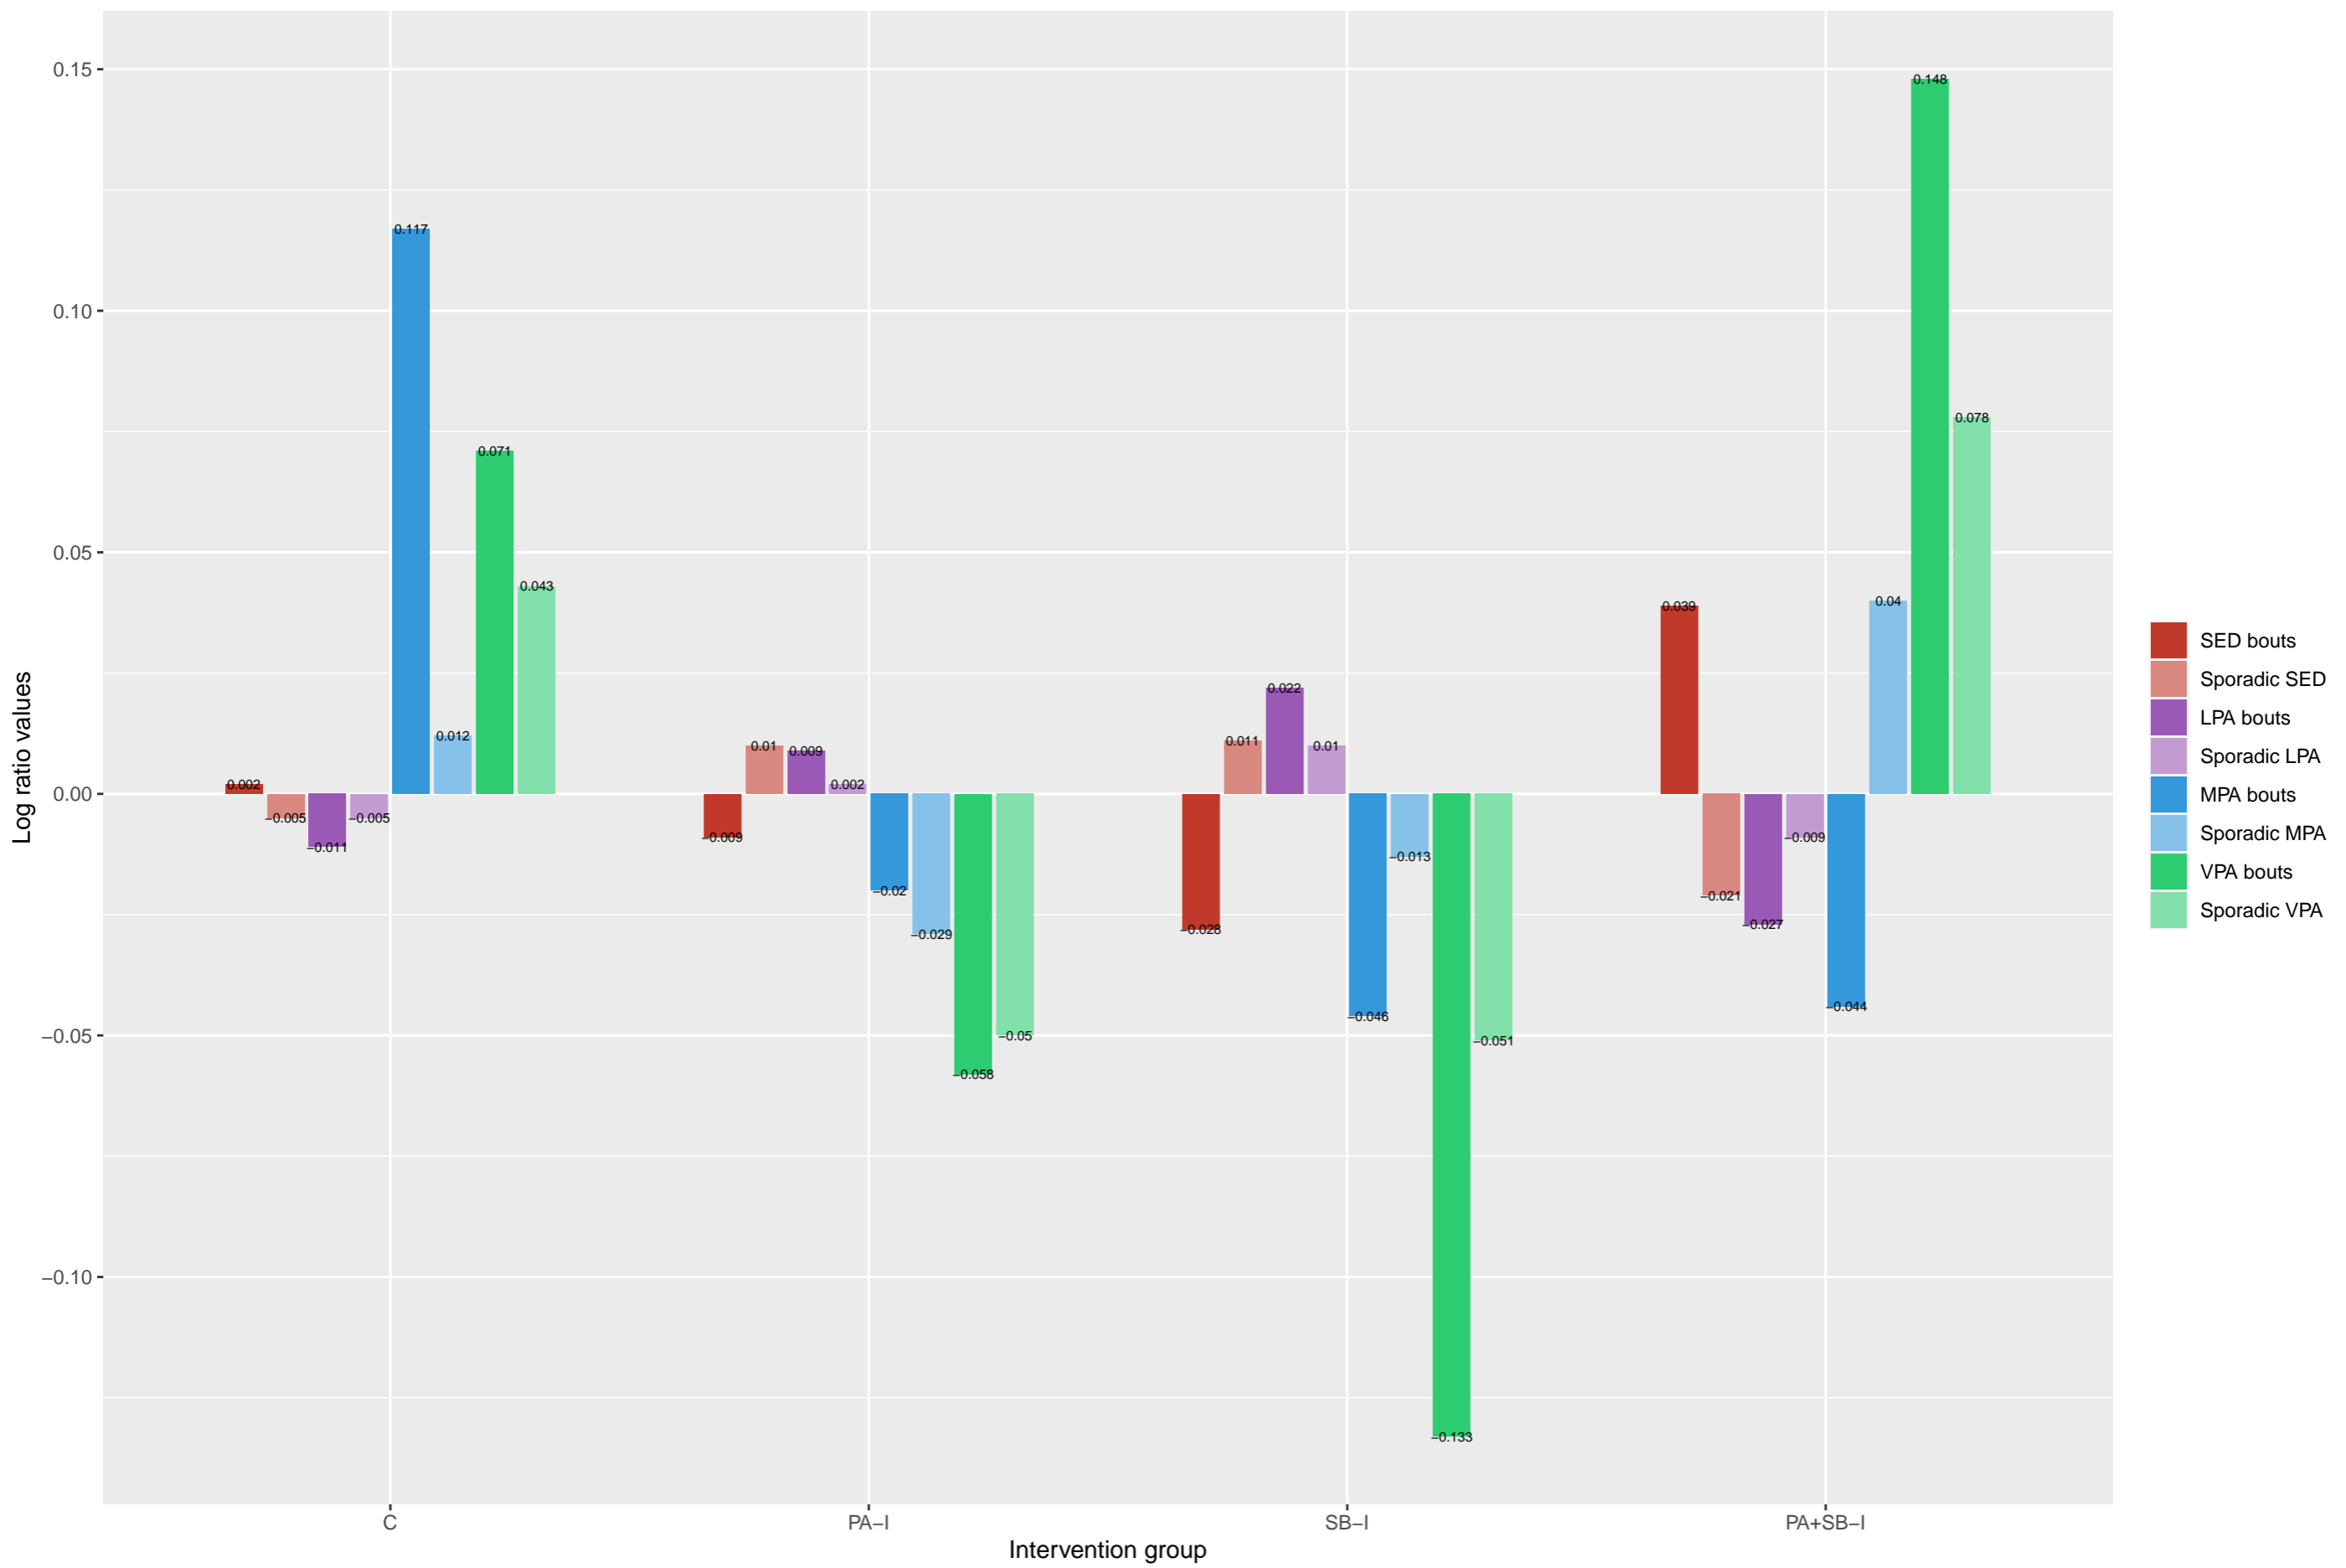

Figure S3. Follow-up (18 months) movement behaviour accumulation compositions per intervention group

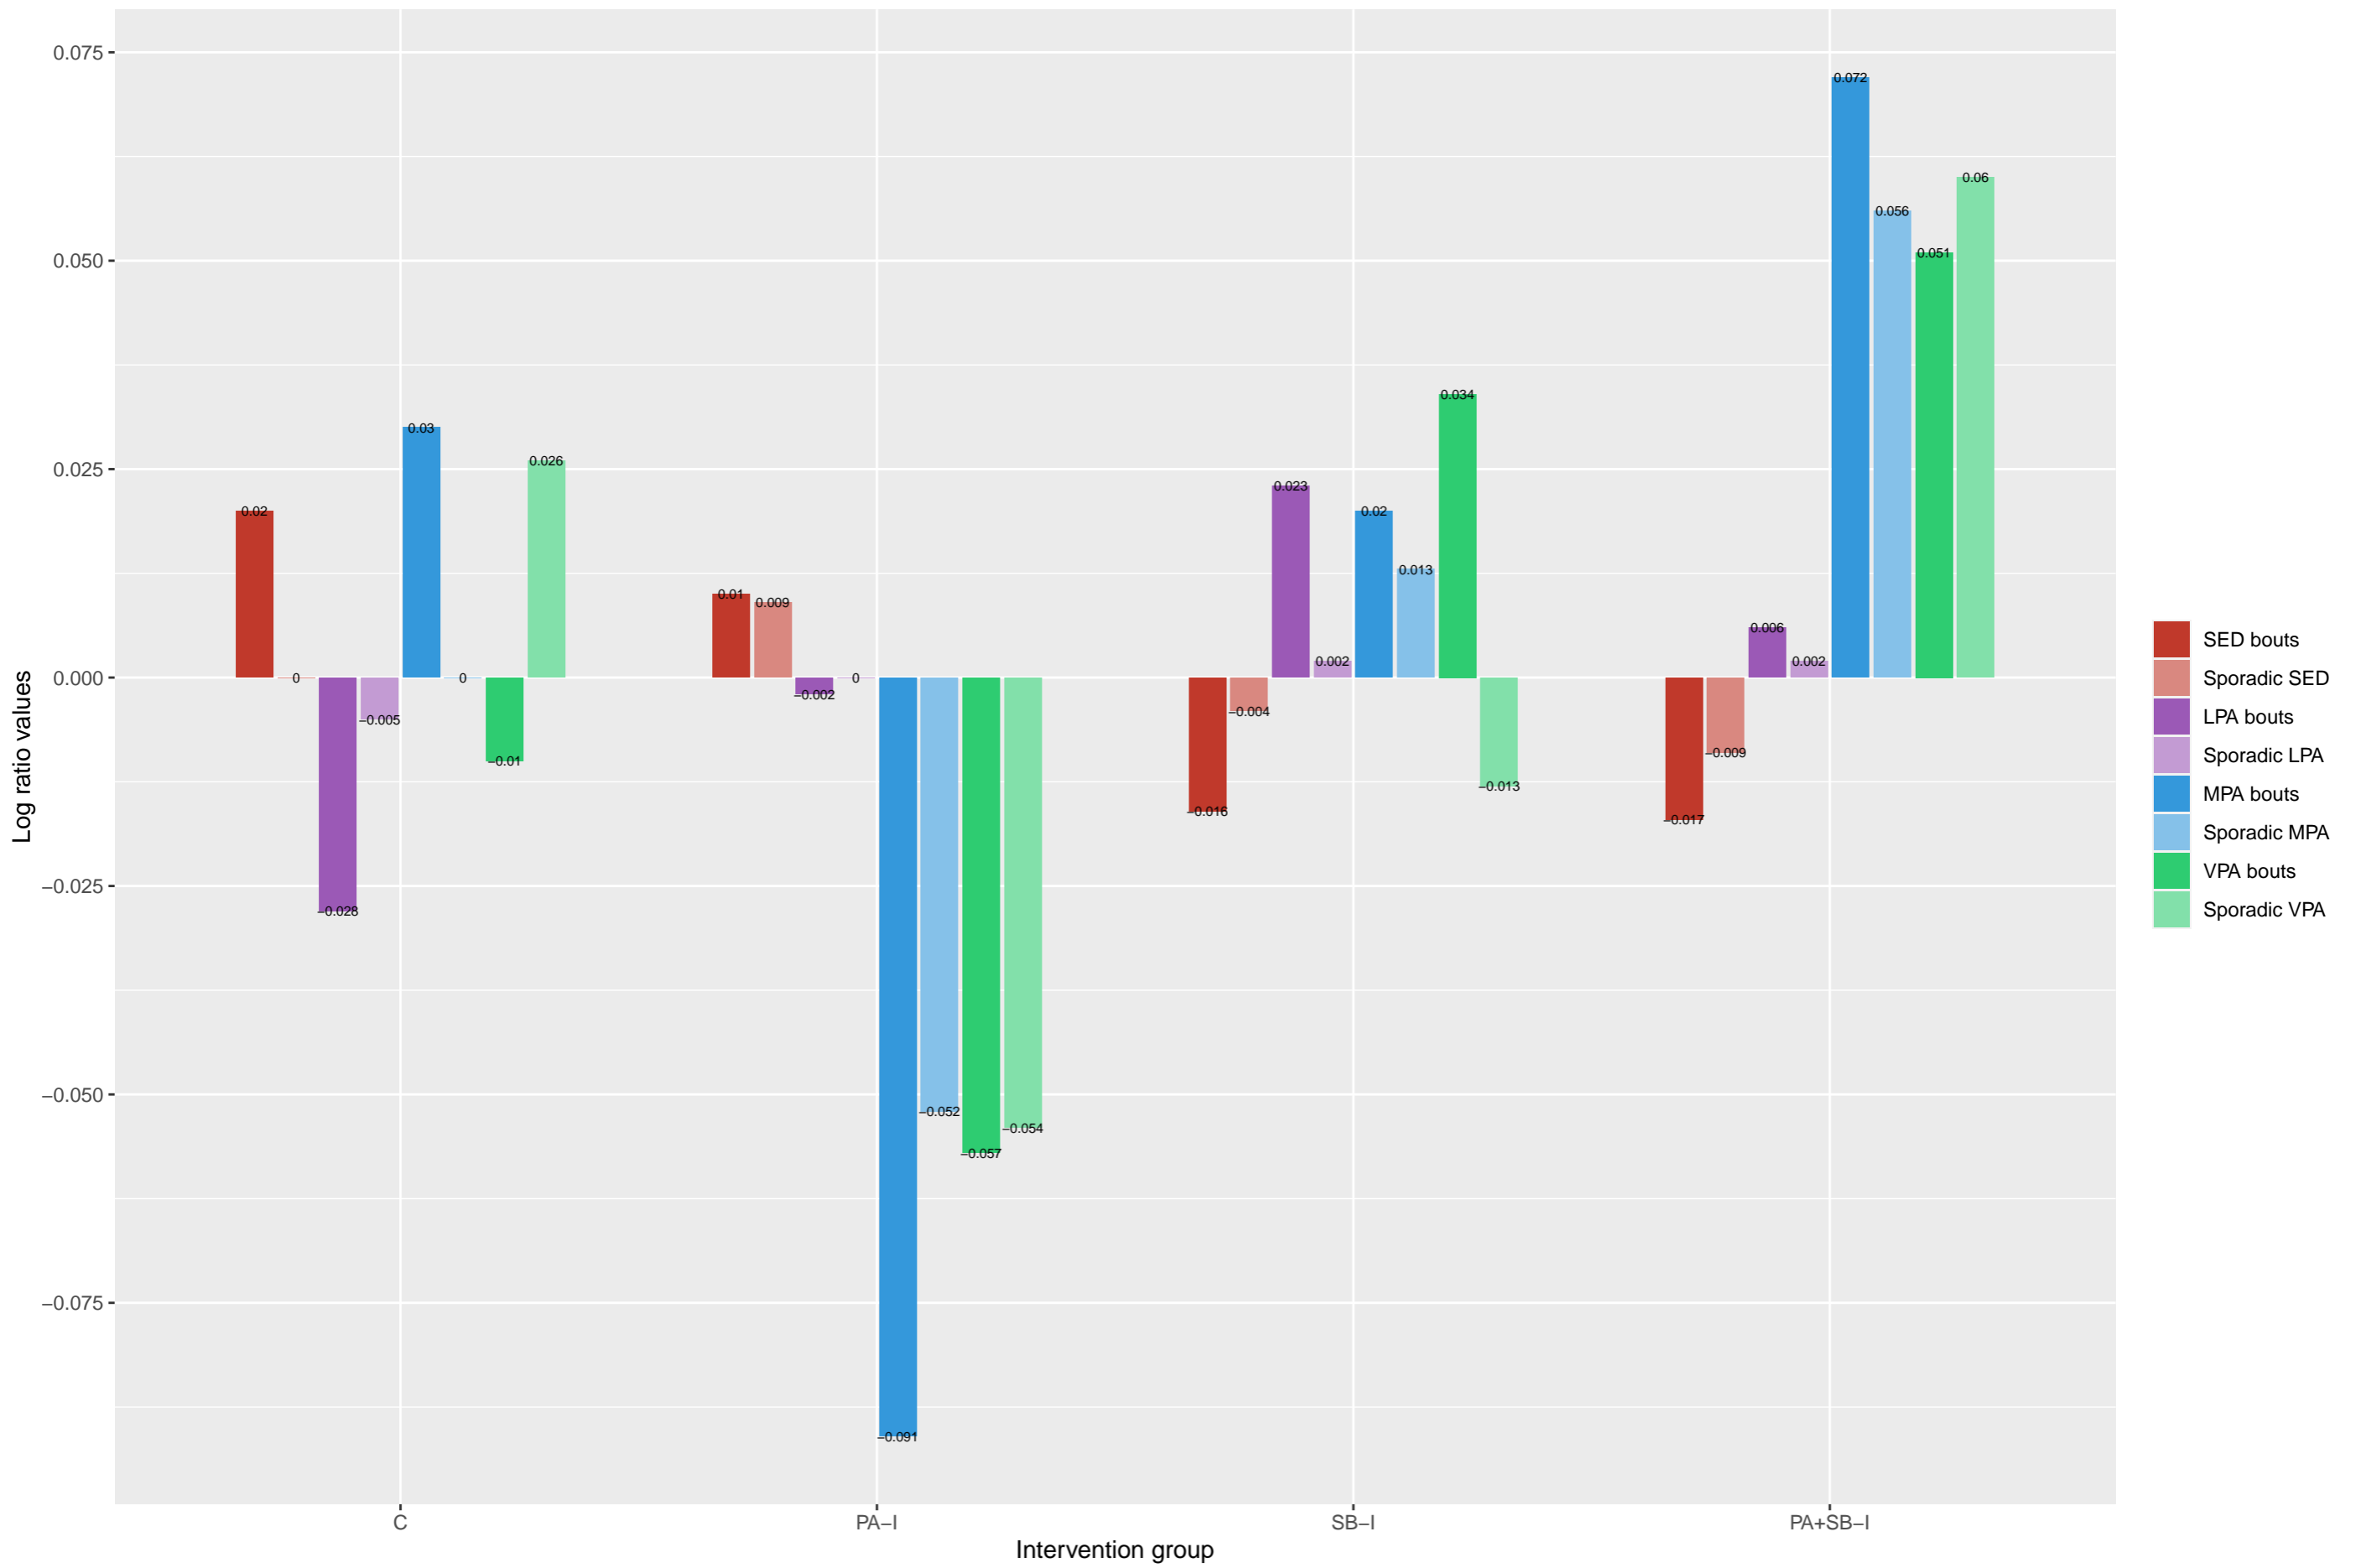

Figure S4. Baseline total volume compositions per intervention group

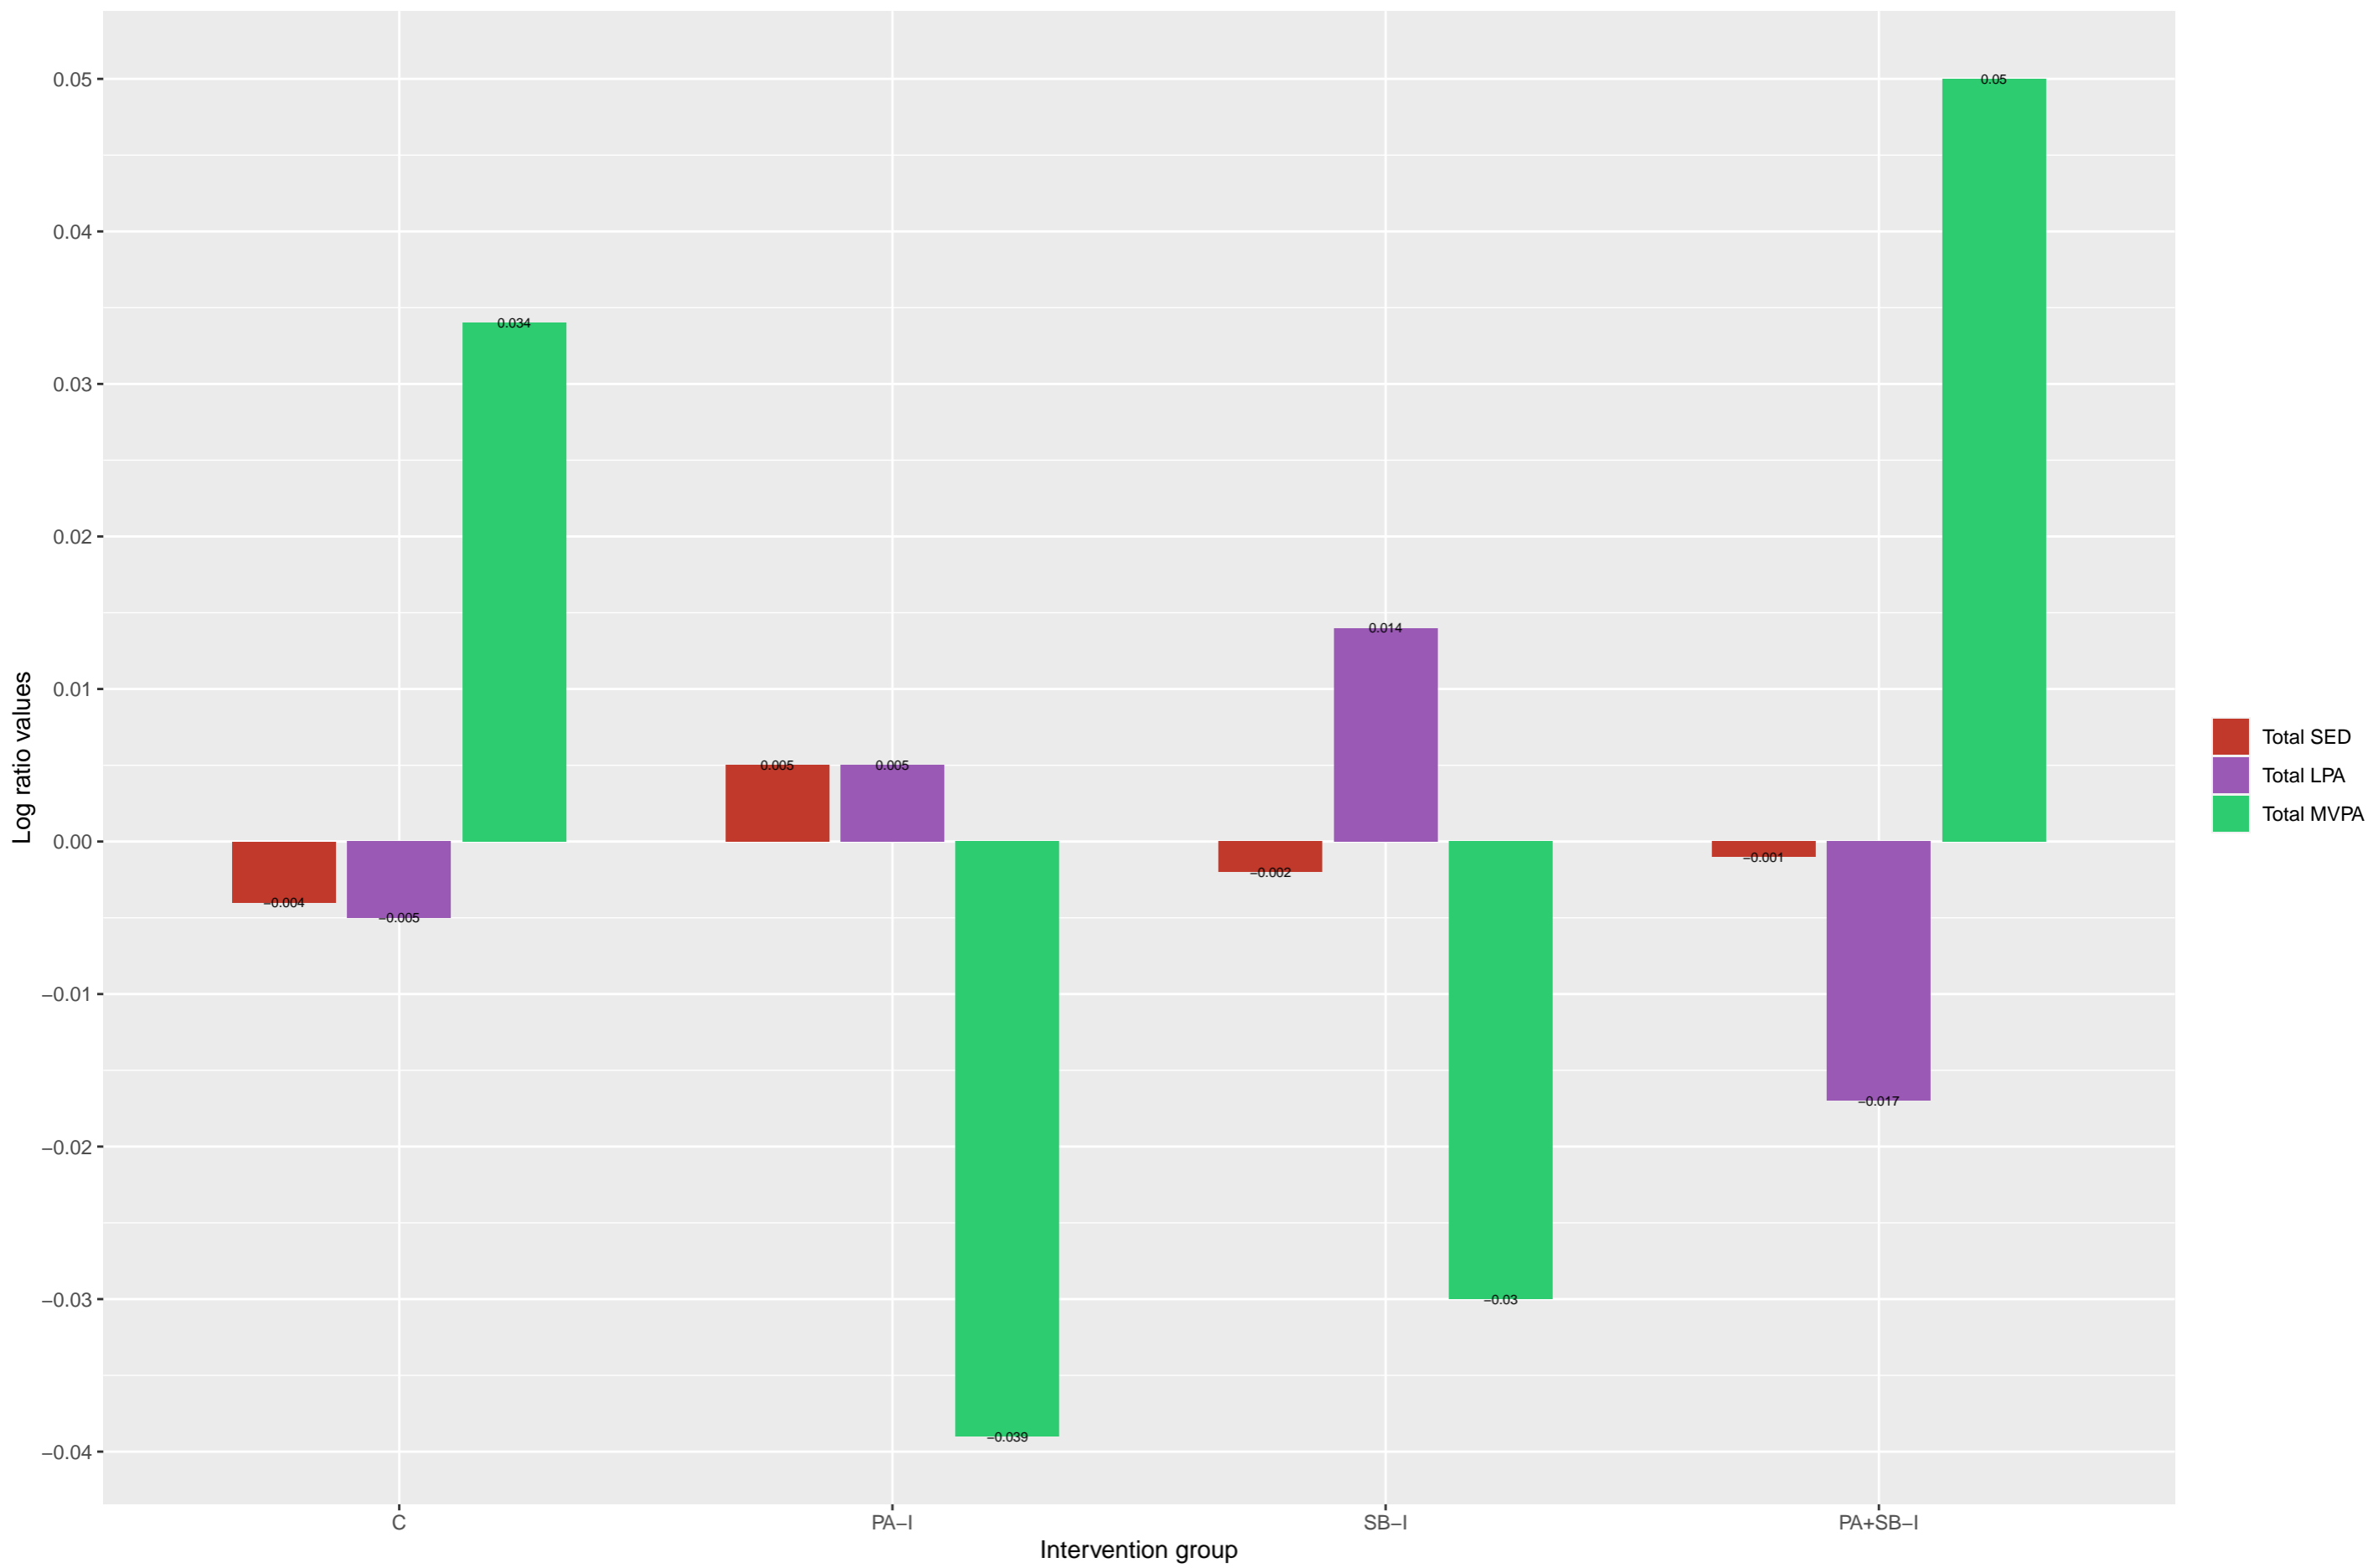

Figure S5. Post-intervention (18 months) total volume compositions per intervention group

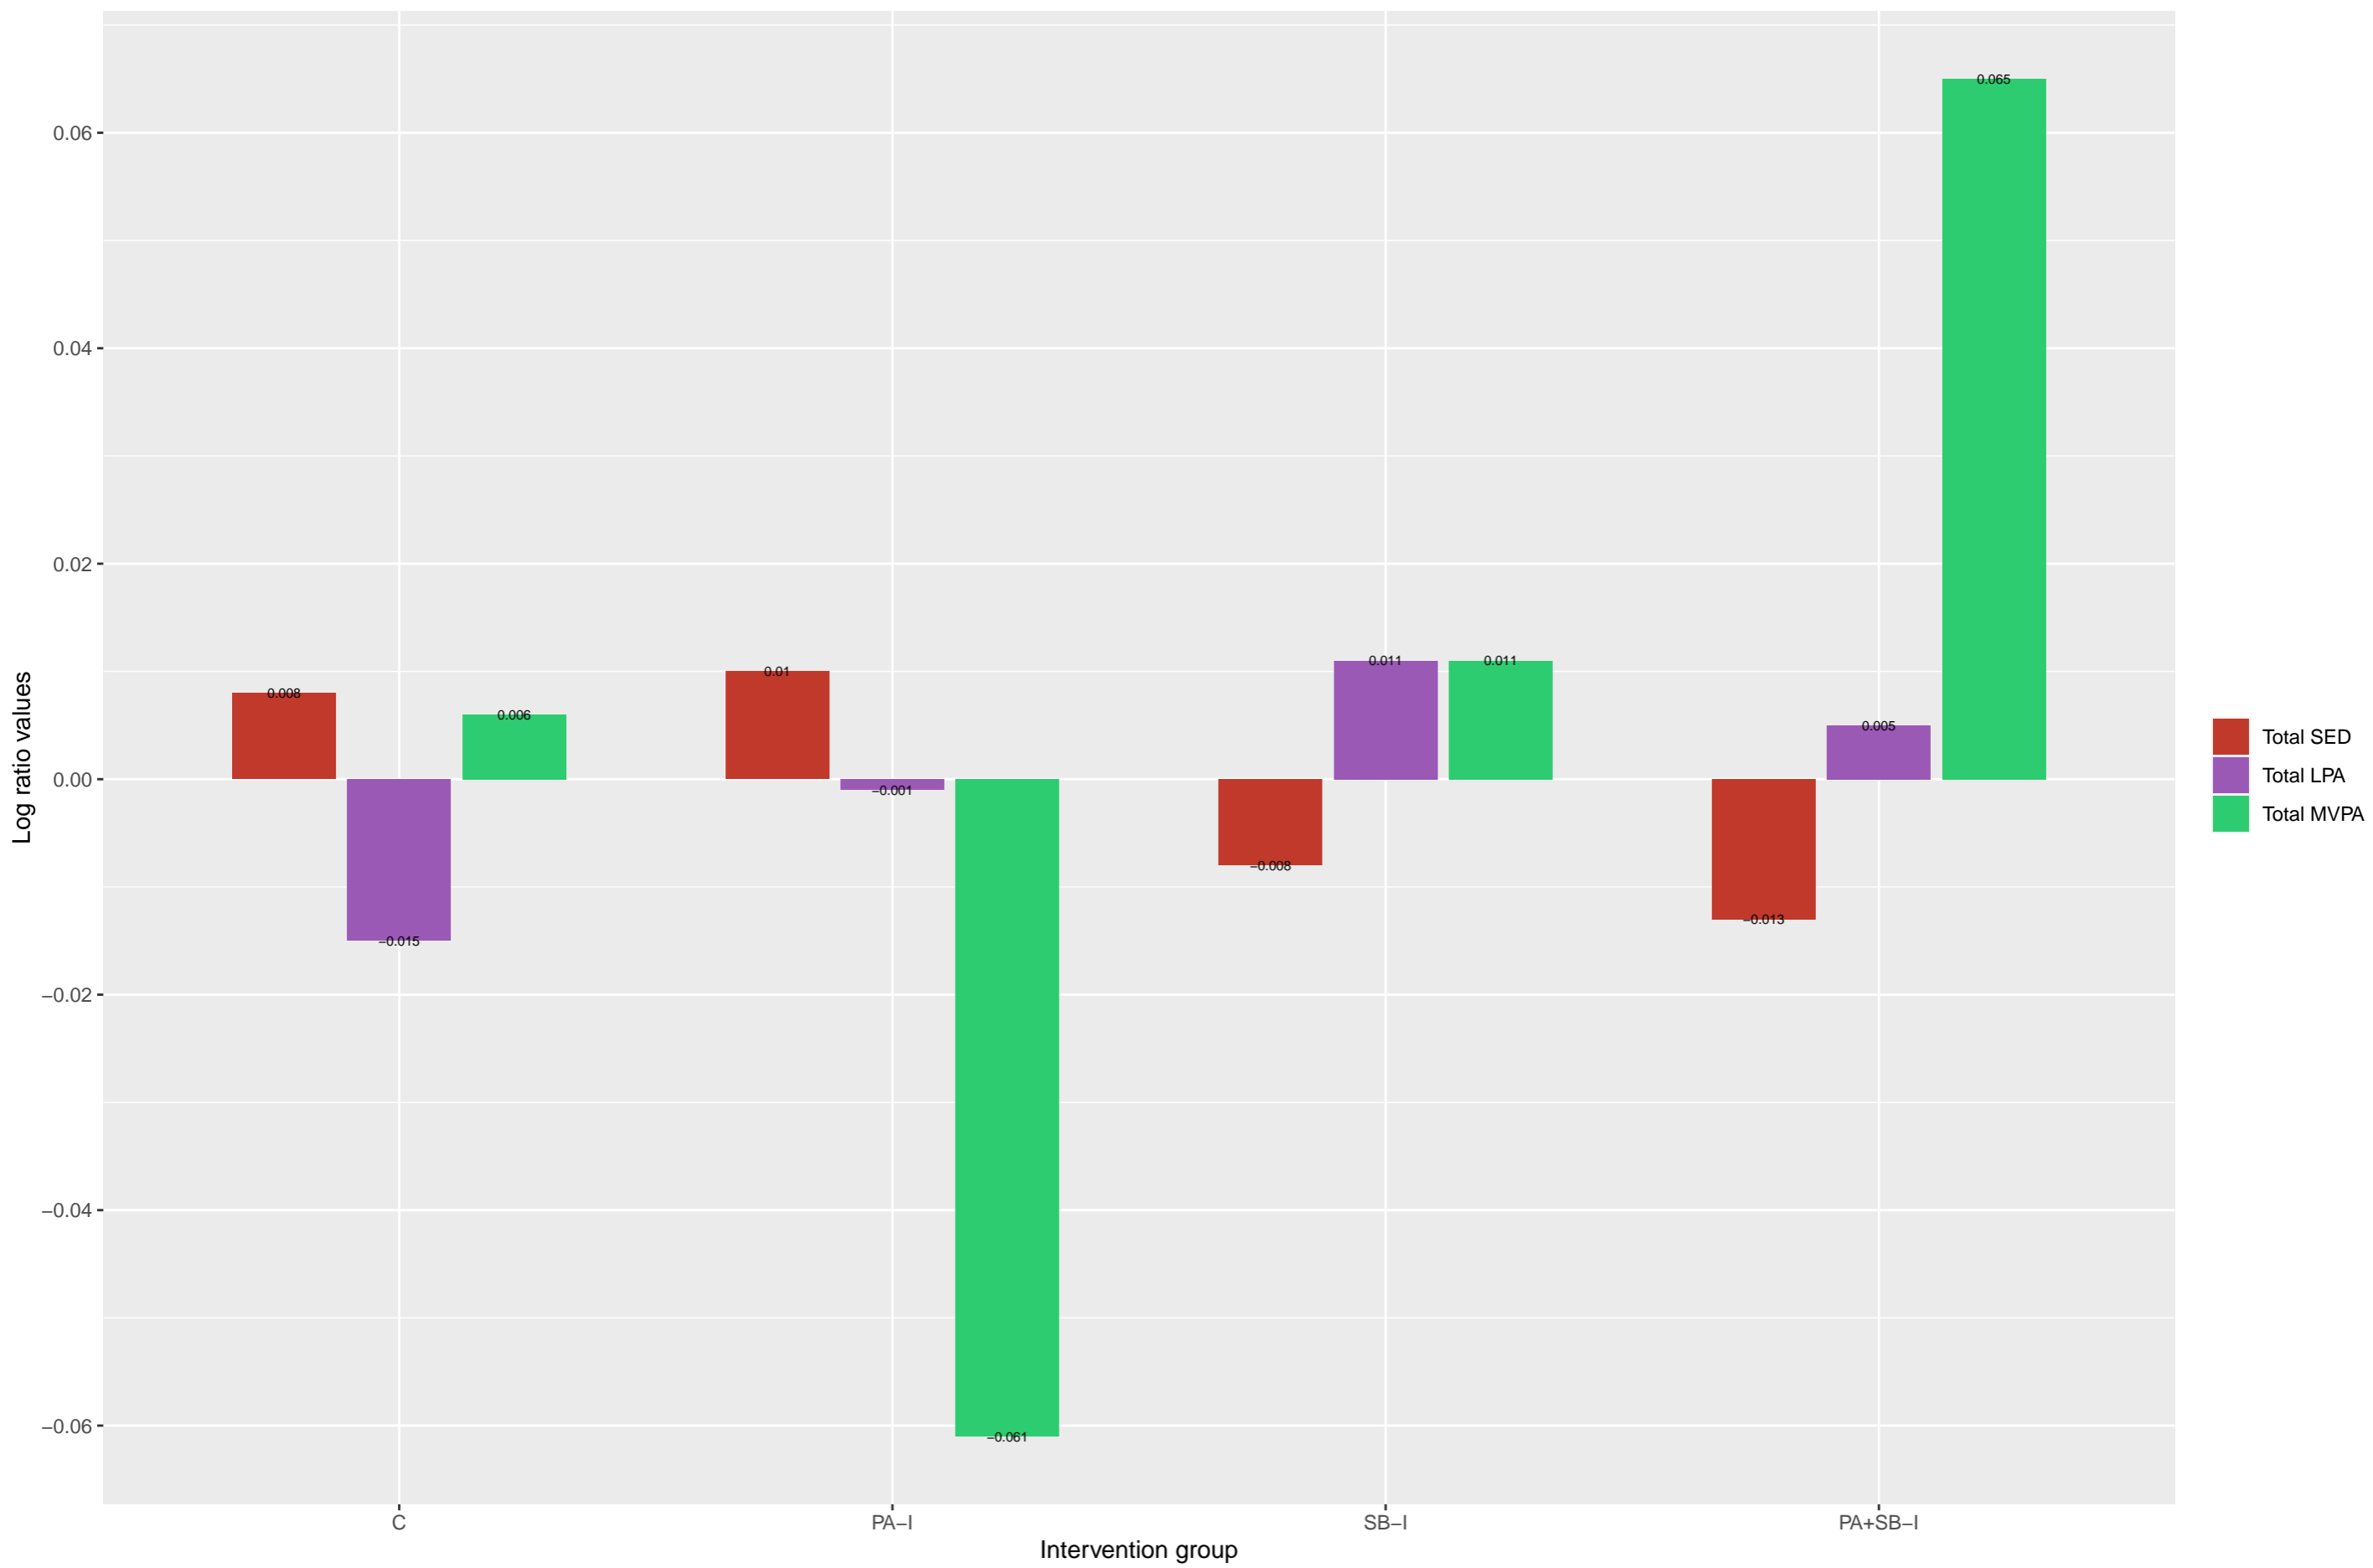

Figure S6. Change between baseline and post-intervention (18 months) in total volume compositions per intervention group

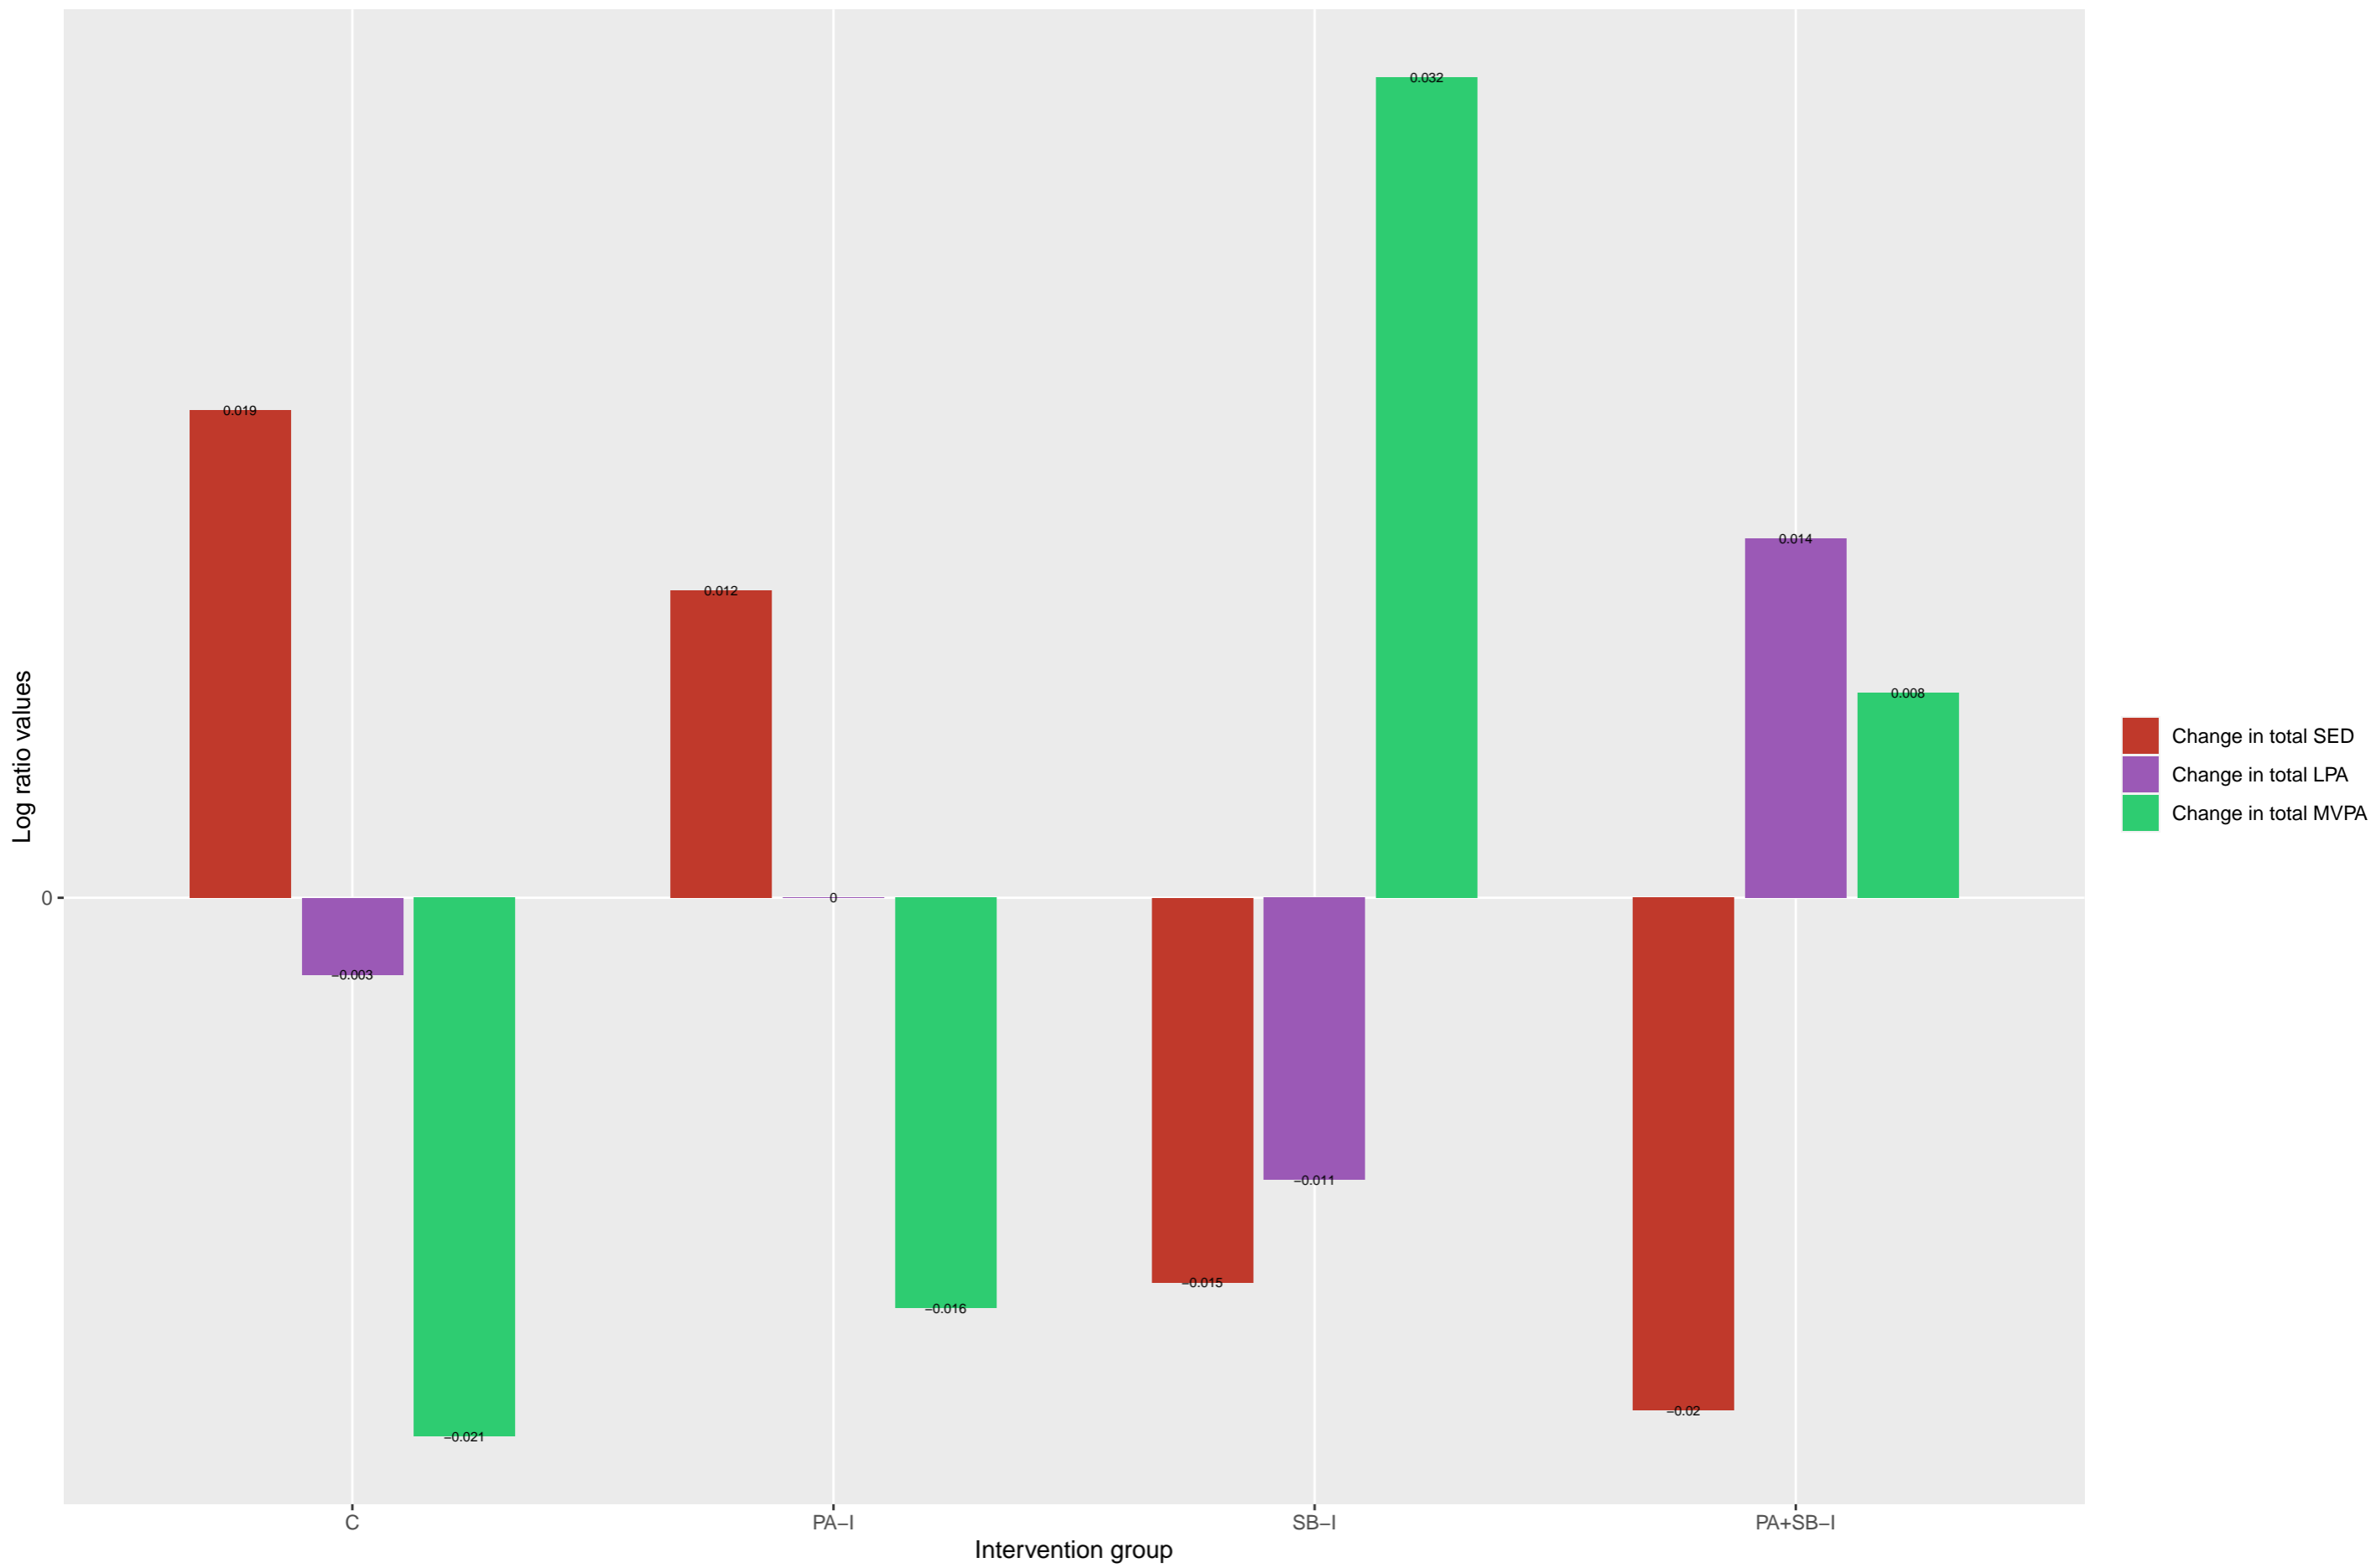

Supplement: 12966_2022_1314_MOESM4_ESM.pdf [file 12966_2022_1314_MOESM4_ESM.pdf]
